# Supplementary material for: Zuccagnia punctata Cav., a Potential Environmentally Friendly and Sustainable Bionematicide for the Control of Argentinean Horticultural Crops
Source: MDPI journal article supplement (doi:10.3390/plants12244104), 2023-12-07
Supplement: s1 [file s1]

Supplementary Materials

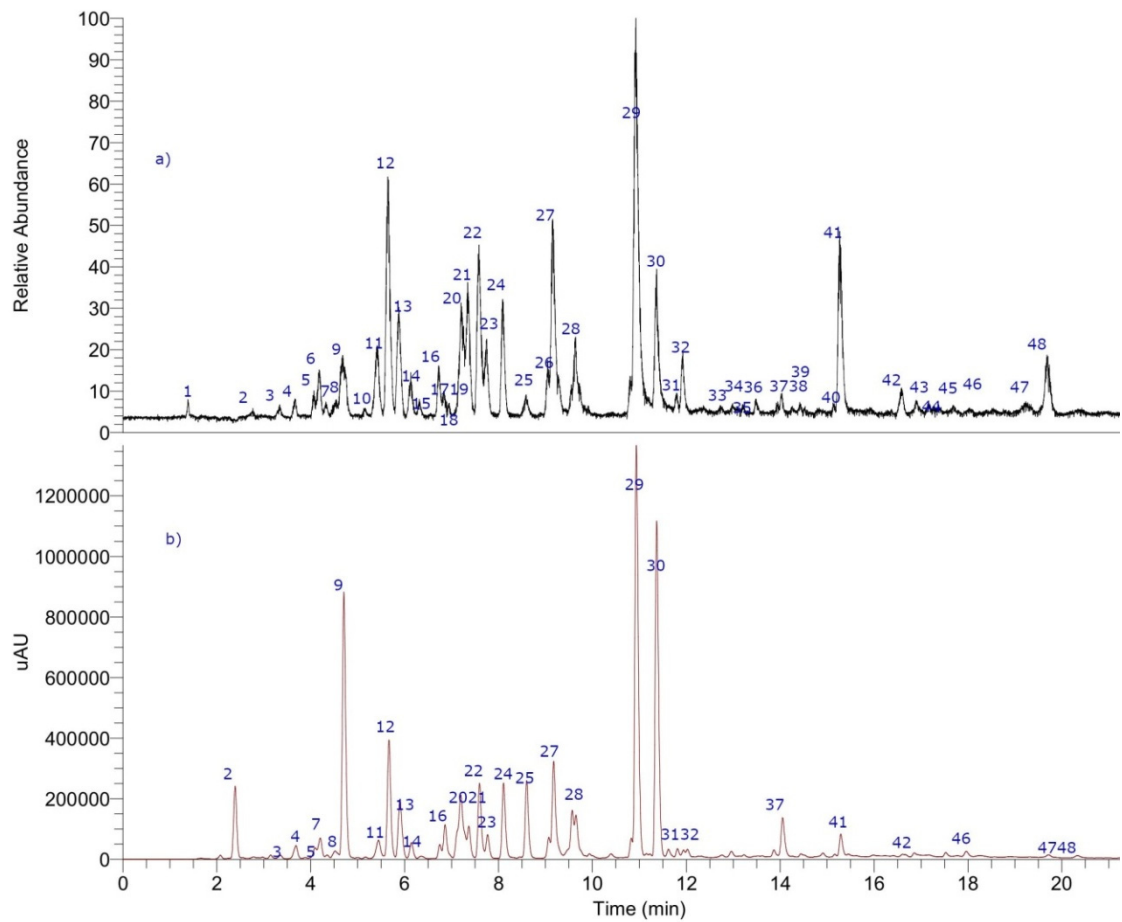

**Figure S1.** The HPLC-MS Fingerprints of ZpRe resin: **(a)** The total Ion Current (TIC) chromatogram and **(b)** the UV-vis chromatogram at 280 nm.

**Table S1.** High resolution UHPLC–PDA–Q-Orbitrap identification of biomolecules from ZpRe resin.

|   | Retention Time (min.) | UV Max | Tentative Identification | Elemental Composition [M-H] <sup>-</sup>       | Theoretical Mass (m/z) | Measured Mass (m/z) | Accuracy (δ ppm) | MS <sup>n</sup> Ions |
|---|-----------------------|--------|--------------------------|------------------------------------------------|------------------------|---------------------|------------------|----------------------|
| 1 | 1.33                  |        | unknown                  | C <sub>16</sub> H <sub>15</sub> O <sub>5</sub> | 85.00343               |                     |                  |                      |
| 2 | 2.77                  | 279    | Naringenin               | C <sub>15</sub> H <sub>11</sub> O <sub>5</sub> | 271.06110              | 271.0601            | 3.67             |                      |

|    |      |                 |                                                                               |                                                |           |          |      |                                                              |
|----|------|-----------------|-------------------------------------------------------------------------------|------------------------------------------------|-----------|----------|------|--------------------------------------------------------------|
| 3  | 3.35 | 279-367         | Shikoniin                                                                     | C <sub>16</sub> H <sub>15</sub> O <sub>5</sub> | 287.09325 | 287.0923 | 3.40 |                                                              |
| 4  | 3.65 | 279             | Afzelechin                                                                    | C <sub>15</sub> H <sub>13</sub> O <sub>5</sub> | 273.07575 | 273.0766 | 3.22 |                                                              |
| 5  | 4.05 | -               | Calonectrin                                                                   | C <sub>19</sub> H <sub>25</sub> O <sub>6</sub> | 349.16456 | 349.1654 | 2.58 | 85.00342                                                     |
| 6  | 4.18 | 279             | EpiAfzelechin                                                                 | C <sub>15</sub> H <sub>13</sub> O <sub>5</sub> | 273.07575 | 273.0766 | 3.10 |                                                              |
| 7  | 4.28 | 287             | Naringenin isomer<br>(could be butein)                                        | C <sub>15</sub> H <sub>11</sub> O <sub>5</sub> | 271.06195 | 271.0611 | 3.67 | 151.0394;<br>109.0286                                        |
| 8  | 4.31 | 287             | 3,7- dihydroxiflavanone                                                       | C <sub>15</sub> H <sub>11</sub> O <sub>4</sub> | 255.06519 | 255.0661 | 3.67 | 151.0394;<br>109. 0286                                       |
| 9  | 4.61 | 287             | 7,8-dihydroxiflavone                                                          | C <sub>15</sub> H <sub>11</sub> O <sub>4</sub> | 255.06519 | 255.0661 | 3.11 | 237.0553;                                                    |
| 10 | 5.12 | 287             | 5-Hydroxy-4',7-<br>dimethoxyflavanone                                         | C <sub>17</sub> H <sub>15</sub> O <sub>5</sub> | 299.09140 | 299.0929 | 2.95 | 285.0403;<br>179.0345,<br>135.0444 (100)                     |
| 11 | 5.38 | 287             | 3,7,8<br>Trihydroxydihydroflavanone                                           | C <sub>15</sub> H <sub>11</sub> O <sub>5</sub> | 271.06010 | 271.0610 | 3.33 | 253.0503;<br>225.0552;<br>197.0603;<br>151.0029              |
| 12 | 5.67 | 234-292-<br>125 | 1-methyl-3-(3',4'-<br>dihydroxyphenyl)-propyl<br>caffeic acid ester           | C <sub>19</sub> H <sub>19</sub> O <sub>6</sub> | 343.11761 | 343.1187 | 2.49 | 179.0344;<br>161.0236;<br>135.0443                           |
| 13 | 5.88 | 236-277-<br>112 | 1-methyl-3-(3',4'-<br>dihydroxyphenyl)-propyl<br>caffeic<br>acid ester isomer | C <sub>19</sub> H <sub>19</sub> O <sub>6</sub> | 343.11761 | 343.1183 | 2.22 | 257.0818;<br>179.0345;<br>151.0393;<br>135.0444;<br>107.0494 |
| 14 | 5.88 | 236-277-<br>112 | Guibourtinidol                                                                | C <sub>15</sub> H <sub>13</sub> O <sub>4</sub> | 257.08084 | 257.0816 | 3.10 | 179.0345;<br>151.0393;<br>135.0444;<br>107.0494              |
| 15 | 6.14 | 279-367         | 1-methyl-3-(3',4'-<br>dihydroxyphenyl)-propyl caffeic<br>acid ester isomer    | C <sub>19</sub> H <sub>19</sub> O <sub>6</sub> | 343.11853 | 343.1187 | 2.66 | 287.0818;<br>151.0393;<br>119.0495;<br>107.0494              |
| 16 | 6.14 | 279-367         | Shikoniinisomer                                                               | C <sub>16</sub> H <sub>15</sub> O <sub>5</sub> | 287.09140 | 287.0923 | 3.18 | 151.0393;<br>119.0495;<br>107.0494                           |
| 17 | 6.27 | 285             | 7,4'-dihydroxy-5methoxy<br>flavanone                                          | C <sub>16</sub> H <sub>13</sub> O <sub>5</sub> | 285.07575 | 285.0766 | 3.19 | 149.9952;<br>119.0495                                        |
| 18 | 6.73 | 287             | Dihydroxyflavanone                                                            | C <sub>15</sub> H <sub>11</sub> O <sub>4</sub> | 255.06519 | 255.0669 | 3.05 | 237.0553;<br>209.0604;<br>195.0400                           |

|    |       |                     |                                                                   |                                                |           |          |      |                                                               |
|----|-------|---------------------|-------------------------------------------------------------------|------------------------------------------------|-----------|----------|------|---------------------------------------------------------------|
| 19 | 6.91  | 251-349             | Rhamnetin                                                         | C <sub>16</sub> H <sub>11</sub> O <sub>7</sub> | 315.04993 | 315.0511 | 3.18 | 185.00346;<br>146.93796                                       |
| 20 | 7.18  | 246-324             | 3,7-dihydroxyflavone                                              | C <sub>15</sub> H <sub>9</sub> O <sub>4</sub>  | 253.05029 |          | 2.99 | 208.0524;<br>223.0326                                         |
| 21 | 7.31  | 277-314             | 1-methyl-3-(4'-hydroxyphenyl)-propyl caffeic acid ester           | C <sub>19</sub> H <sub>19</sub> O <sub>5</sub> | 327.12357 | 327.1227 | 2.64 | 135.0443;                                                     |
| 22 | 7.55  | 242, 291-<br>324    | 2-methyl-3-(3-hydroxy-4'-methoxyphenyl)-propyl caffeic acid ester | C <sub>20</sub> H <sub>21</sub> O <sub>6</sub> | 357.13409 | 357.1332 | 2.32 | 343.1104;<br>193.0500;<br>179.0343;<br>161.0237;<br>135.0440; |
| 23 | 7.70  | 249-285-<br>323     | 1-methyl-3-(4'-hydroxyphenyl)-propyl caffeic acid ester isomer    | C <sub>19</sub> H <sub>19</sub> O <sub>5</sub> | 327.12380 | 327.1227 | 3.01 | 179.0344;<br>163.0394;<br>135.0443;<br>119.0494               |
| 24 | 8.04  | 235-343             | Pinocembrin(5, 7-dihydroxyflavanone)                              | C <sub>15</sub> H <sub>11</sub> O <sub>4</sub> | 255.06601 | 255.0651 | 3.23 | 227.0907;<br>213.0503;<br>164.0109;<br>151.0029;<br>123.0080  |
| 25 | 8.54  | 239-306             | 2'-hidroxy-4methoxichalcone                                       | C <sub>16</sub> H <sub>13</sub> O <sub>3</sub> | 253.08592 | 253.0866 | 3.02 |                                                               |
| 26 | 9.00  | 291                 | Pinocembrinisomer                                                 | C <sub>15</sub> H <sub>11</sub> O <sub>4</sub> | 255.06599 | 255.0651 | 3.17 | 227.0709;<br>213.0553;<br>164.0109;<br>145.0642;<br>123.0080  |
| 27 | 9.14  | 267 315<br>360      | Galangin(3,5,7-trihydroxyflavone)                                 | C <sub>15</sub> H <sub>9</sub> O <sub>5</sub>  | 269.04579 | 269.0453 | 3.22 | 213.0551;<br>169.0653;                                        |
| 28 | 9.61  | 242-268-<br>310-357 | Caffeic acid phenetylesther                                       | C <sub>17</sub> H <sub>15</sub> O <sub>4</sub> | 283.09649 | 283.0794 | 3.38 |                                                               |
| 29 | 10.90 | 232-346             | 2',4'-dihydroxychalcone                                           | C <sub>15</sub> H <sub>11</sub> O <sub>3</sub> | 239.07027 | 239.0710 | 2.91 | 197.0603;<br>169.0653;<br>153.0186;<br>135.0080;              |
| 30 | 11.37 | 232-345             | 2',4'-dihydroxy-3'-methoxychalcone                                | C <sub>16</sub> H <sub>13</sub> O <sub>4</sub> | 269.08167 | 269.0808 | 3.08 |                                                               |
| 31 | 11.88 | 231-308-<br>347     | 1-methyl-3-(4'-hydroxyphenyl)-propyl p-coumaric acid ester isomer | C <sub>19</sub> H <sub>19</sub> O <sub>4</sub> | 311.12866 | 311.1289 | 2.81 | 179.0344;<br>163.0394;<br>135.0444;<br>119.0494               |
| 32 | 12.01 | 277-312             | Dunnione                                                          | C <sub>15</sub> H <sub>13</sub> O <sub>3</sub> | 241.08592 | 241.0866 | 2.98 |                                                               |
| 33 | 12.78 | 287                 | Flavanone                                                         | C <sub>15</sub> H <sub>11</sub> O <sub>3</sub> | 239.07027 | 239.0709 | 2.91 | 197.0603;<br>169.0653;<br>153.0186;                           |

|    |       |         |                                                                     |                                                |           |           |       |                                                                |
|----|-------|---------|---------------------------------------------------------------------|------------------------------------------------|-----------|-----------|-------|----------------------------------------------------------------|
|    |       |         |                                                                     |                                                |           |           |       | 135.0080;<br>121.0280                                          |
| 34 | 13.00 |         | unknown                                                             |                                                |           |           |       |                                                                |
| 35 | 13.37 |         | unknown                                                             |                                                |           |           |       |                                                                |
| 36 | 13.50 | 285     | Blestriarene B                                                      | C <sub>30</sub> H <sub>23</sub> O <sub>6</sub> | 479.14957 | 479.14891 | 1.36  |                                                                |
| 37 | 14.10 | 280-323 | 4'-terbutyloxyphenyl p-coumaric acid ester isomer                   | C <sub>19</sub> H <sub>19</sub> O <sub>4</sub> | 311.12779 | 311.1286  | 2.71  | 179.0344;<br>161.0237;<br>135.0442;                            |
| 38 | 14.52 | 283     | Glyvenol                                                            | C <sub>29</sub> H <sub>33</sub> O <sub>6</sub> | 477.22754 | 477.2271  | 0.78  |                                                                |
| 39 | 14.55 | 293     | 1-methyl-3-(3',4'-dihydroxyphenyl)-propyl caffeic acid ester isomer | C <sub>19</sub> H <sub>19</sub> O <sub>6</sub> | 343.11761 | 343.1183  |       | 179.0344;<br>161.0238;135.0442; 109.0286                       |
| 40 | 15.40 | 280     | Vedelianin                                                          | C <sub>29</sub> H <sub>35</sub> O <sub>6</sub> | 479.24882 | 479.2433  | 1.17  |                                                                |
| 41 | 15.47 | 280     | Hidroxivedelianin                                                   | C <sub>29</sub> H <sub>35</sub> O <sub>7</sub> | 495.23773 | 495.2381  | 0.82  | 161.0238;<br>135.0443;<br>109.0286                             |
| 42 | 16.60 |         | 3,7-dimethyl-2-octaenyl caffeic acid ester                          | C <sub>19</sub> H <sub>21</sub> O <sub>4</sub> | 313.14344 | 313.1443  | 2.91  |                                                                |
| 43 | 17.04 | 267-357 | Hidroxivedelianin isomer                                            | C <sub>29</sub> H <sub>35</sub> O <sub>7</sub> | 495.23785 | 495.2377  | 0.25  | 479.24323,<br>239.0710;<br>179.0345;<br>161.0238;<br>135.0442; |
| 44 | 17.12 | 285     | Vedelianin derivative                                               | C <sub>29</sub> H <sub>33</sub> O <sub>6</sub> | 477.22717 | 477.2276  | 1.10  |                                                                |
| 45 | 17.56 | 285-320 | 3,7-dimethyl-2,6-octadienyl caffeic acid ester (geranyl Caffate)    | C <sub>19</sub> H <sub>23</sub> O <sub>4</sub> | 315.16993 | 315.1600  | 3.10  | 178.0265;<br>134.0364;<br>133.0289                             |
| 46 | 17.98 | 289-320 | Lupinifolin                                                         | C <sub>25</sub> H <sub>25</sub> O <sub>6</sub> | 405.16965 | 405.1754  | -1.27 |                                                                |
| 47 | 19.58 | 289     | Vedelianin isomer                                                   | C <sub>29</sub> H <sub>35</sub> O <sub>6</sub> | 479.24882 | 479.2433  | 1.17  |                                                                |
| 48 | 19.99 | 287     | Shinflavanone                                                       | C <sub>25</sub> H <sub>25</sub> O <sub>4</sub> | 389.17474 | 389.1756  | 2.37  | 371.1654                                                       |
